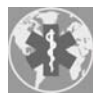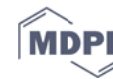

1 Article

## 2 Household Hardships during the COVID-19 Pandemic: Examining Household 3 Vulnerability and Responses to Pandemic Related Shocks in Eastern Ethiopia

4 Jonathan A. Muir<sup>1†\*</sup>, Merga Dheresa<sup>2‡</sup>, Zachary J. Madewell<sup>3</sup>, Tamirat Getachew<sup>2</sup>, Gezahegn Mengesha<sup>2</sup>, Cynthia  
5 G. Whitney<sup>1</sup>, Nega Assefa<sup>2‡</sup>, and Solveig A. Cunningham<sup>1‡</sup>

6 1. Emory University, Atlanta, GA, United States

7 2. Haramaya University, Harar, Ethiopia

8 3. Center for Global Health, Centers for Disease Control and Prevention, Atlanta, GA, United States

9 †Co-first authors

10 ‡Co-senior authors

11 \* Correspondence: Jonathan A. Muir, Emory University, Atlanta, GA, United States, [jamuir@emory.edu](mailto:jamuir@emory.edu)

12 **Abstract:** COVID-19 is associated with one of the largest disturbances to life in the 21<sup>st</sup> century. To  
13 quell disease spread, governments implemented lockdowns that likely created hardships for  
14 households. To improve knowledge of consequences, we examine how the pandemic period was  
15 associated with household hardships and assess factors associated with these hardships. We con-  
16 ducted a cross-sectional study using quasi-Poisson regression to examine factors associated with  
17 household hardships. Data were collected between August and September of 2021 from a random  
18 sample of 880 households living in a Health and Demographic Surveillance System (HDSS) located  
19 in the Harari Region and the District of Kersa, both in Ethiopia. Having a head of household with no  
20 education, residing in a rural area, larger household size, lower income and/or wealth, and com-  
21 munity responses to COVID-19 including lockdowns and travel restrictions were independently  
22 associated with experiencing household hardships. Our results identify characteristics of groups  
23 at-risk for food insecurity during the pan-demic; households that were already struggling prior to  
24 the onset of the pandemic were at greatest risk of adverse consequences during the pandemic pe-  
25 riod. These findings may inform future efforts to mitigate the consequences of COVID-19 and future  
26 disease out-breaks.

27 **Keywords:** SARS-CoV-2; Africa; Resilience; Vulnerability

28

### 29 1. Introduction

Citation: To be added by editorial  
staff during production.

Academic Editor: Firstname  
Lastname

Received: date

Revised: date

Accepted: date

Published: date

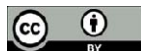

Copyright: © 2023 by the authors.

Submitted for possible open access

publication under the terms and

conditions of the Creative Commons

Attribution (CC BY) license

([https://creativecommons.org/licenses](https://creativecommons.org/licenses/by/4.0/)

[https://creativecommons.org/licenses](https://creativecommons.org/licenses/by/4.0/)

30 The COVID-19 pandemic resulted in one of the largest disturbances to life in the 21<sup>st</sup>  
31 century. Beyond direct health effects,[1] the pandemic had social and economic conse-  
32 quences as government-enforced lockdowns were implemented to stem the pace and  
33 severity of the disease.[2] To adhere to these lockdowns, many businesses closed their  
34 in-person offices temporarily; for some, business closure was permanent. Mitigation ef-  
35 forts also affected healthcare providers who had to restrict in-person access to patients  
36 and/or limit services. These efforts may have affected the health of young children,  
37 pregnant women, and mothers by limiting access to healthcare and sufficient  
38 food—especially in isolated regions of resource-limited countries.[3-15] These indirect  
39 effects, in return, would exacerbate direct effects of the SARS-CoV-2 virus by increasing  
40 risk for undernutrition and other conditions that heighten the danger of serious illness.  
41 [14,15] Knowledge on the extent to which households living in resource-limited countries  
42 have experienced resource restrictions and other hardships remains limited due to in-  
43 complete or nonexistent population surveillance.[16]

44 In sub-Saharan Africa (SSA), national governments undertook considerable efforts to

45 quell the spread of COVID-19.[2,17] Mitigation efforts in Ethiopia included social dis-  
46 tancing, lockdowns, and emphasizing hygiene protocols; these efforts were started on  
47 March 16<sup>th</sup> of 2020, intensified on March 20<sup>th</sup>, and ultimately a state of emergency was  
48 declared on April 10<sup>th</sup>. [18] Economic and social disparities across different  
49 sociodemographic groups and geospatial inequalities may have resulted in uneven im-  
50 plementation of these efforts.[11] These disparities may also have resulted in differential  
51 household and community vulnerability to unintended consequences of these efforts.

52 Vulnerability is the collective effect of cultural, economic, institutional, political, and so-  
53 cial processes that modify the experience of and recovery from a given hazard.[19] In the  
54 context of disasters, it is often not the hazard itself that creates the disaster; rather, the  
55 disaster is the impact on individual and community coping patterns and the inputs and  
56 outputs of social systems.[20-22] Social vulnerability is partially the result of social dis-  
57 parities that shape or influence the susceptibility of different groups to hazards while also  
58 controlling their capacity to respond.[23,24] Individual and household level factors often  
59 associated with vulnerability include demographic characteristics such as age, ethnicity,  
60 race, and sex; socioeconomic status (e.g., income, wealth, employment, and/or educa-  
61 tion); household composition (e.g., presence of children or elderly); and housing and  
62 transportation.[25] However, social vulnerability also involves place disparities stem-  
63 ming from characteristics of communities and the built environment. For example, dif-  
64 ferential availability of scarce resources between urban and rural areas may exacerbate  
65 individual and household level vulnerabilities to hazards.[26-28] To understand the  
66 broader consequences of the pandemic, it is important to consider economic, political,  
67 and social markers of vulnerability at the individual, household, and community level.  
68 [20-24]

69 In Ethiopia, those already burdened by social and economic disparities and limited in  
70 their ability to access resources are at greater risk for experiencing additional hardships  
71 during the pandemic.[7,11,17] Specific demographic groups disproportionately vulnera-  
72 ble include: older adults, people with disabilities or pre-existing medical conditions, the  
73 poor, people living in congested residences and/or slums, pregnant women, and the  
74 unemployed. Rural populations in Ethiopia are at elevated risk for food insecurity and  
75 agricultural hardships as climate change, severe drought, conflict, and environmental  
76 degradation have culminated in societal shocks affecting livelihoods, particularly for  
77 farmers.[29,30] Populations lacking access to safe drinking water and/or sanitary envi-  
78 ronments, reliant upon emergency food aid, or with limited access to media or other  
79 communication technologies are also at greater risk of adverse consequences of the  
80 pandemic.[17] Differential vulnerability requires context specific interventions to address  
81 indirect costs of the pandemic.[31]

82 We used data from an existing Health and Demographic Surveillance System (HDSS) in  
83 Eastern Ethiopia to analyze the prevalence of household level hardships experienced  
84 during the pandemic and examine factors associated with vulnerability to these hard-  
85 ships. We further explore household responses to these hardships and analyze factors  
86 associated with households using these coping strategies.

## 87 **2. Materials and Methods**

### 88 *2.1. Study setting*

89 The setting for this study is a predominantly rural area in the district of Kersa and an  
90 urban area in the Harari People's National Regional State in Eastern Ethiopia.[32,33] The  
91 rural area consists of 24 kebeles (a neighborhood or ward), and covers 353 km<sup>2</sup> with a  
92 population of 135,754 in 25,653 households. The urban area consists of 12 kebeles, a

93  
94  
95

population of 55,773 in 14,768 households, across 25.4 km<sup>2</sup>. The population has been followed through a Health and Demographic Surveillance System since 2012, with demographic and health-related information regularly collected (see Figure 1).

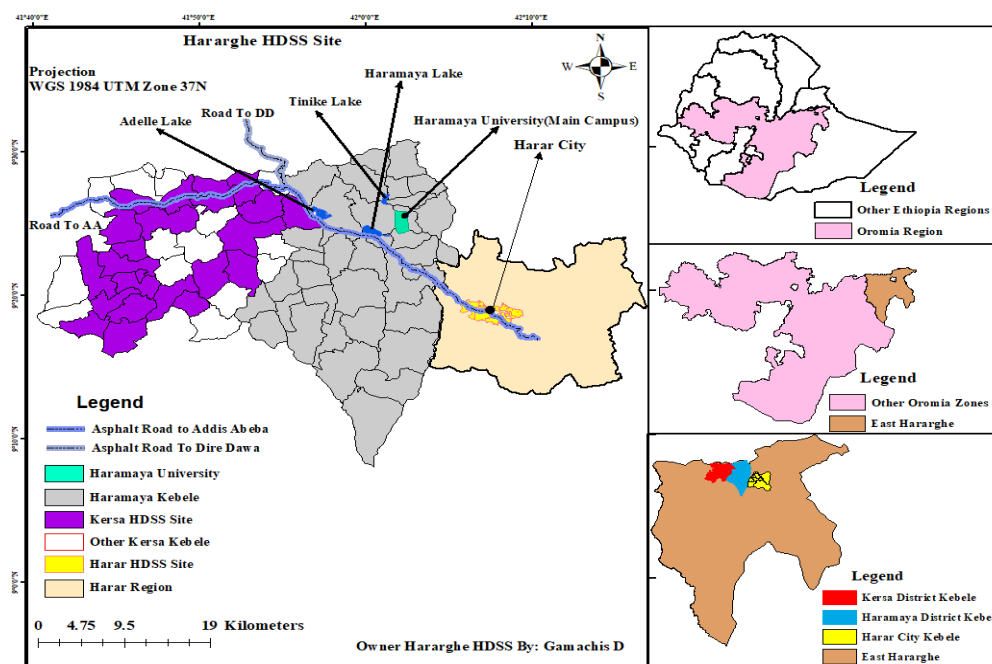

96  
97  
98  
99

Figure 1. The Harar and Kersa Health and Demographic Surveillance System (HDSS) in Eastern Ethiopia. The smaller map panels on the right identify the location of the HDSS catchment areas within Eastern Ethiopia.

100

## 2.2. Study design

101  
102  
103  
104  
105  
106  
107  
108  
109  
110

This study is part of a larger examination within the Child Health and Mortality Prevention Surveillance (CHAMPS) network to understand the consequences of COVID-19 lockdowns for child health and mortality.[33] We administered a short data collection questionnaire designed to understand how the pandemic and related lockdowns may have affected the livelihood, food availability, and healthcare of households. Households were selected using simple random sampling to achieve a sample size of 440 from the rural (Kersa) and from the urban (Harar) catchment areas (total sample size of 880). The sample size was specified to detect prevalence of changes in accessing healthcare. A priori specifications were 50% of the population experiencing changes, 95% CI, precision of 0.05 and non-response adjustment of 10%.

111  
112  
113  
114  
115  
116  
117  
118  
119  
120  
121  
122  
123

The survey questionnaire was structured into five sections: knowledge regarding the spread of COVID-19; food availability; COVID-19 related shocks/coping; under-five child healthcare services; and healthcare services for pregnant women. Questions in the survey instrument related to hardships associated with the pandemic period asked respondents to consider whether a given hardship had occurred since March of 2020. Data collectors were drawn from the fieldwork teams of HDSS enumerators already trained and working in the HDSS. Data collection occurred between August and September of 2021 and was carried out through tablet-based in-person interviews with adult household members. Survey data from the questionnaire were linked with data from the most recent HDSS round to incorporate additional demographic data about the respective household: specifically, age, sex, occupation, and education of the head of household; the number of children under 5 years of age and the number of adults over age 60 in the household; and household assets and residence construction materials. Data quality assurance and

124 cleaning followed standard procedures for the HDSS.[32,34] Inconsistent or missing data  
125 were flagged for data collectors to correct. Field supervisors and the field coordinator  
126 selected a random sample of questionnaires for re-visits to validate the recorded infor-  
127 mation. Implementation of the module was approved by an Institutional Health Research  
128 Ethics Review Committee (IHRERC); approval reference number  
129 Ref.No.IHRERC/127/2021.

### 130 2.3. Measures

131 The variable of interest *Household Hardships* was generated as an additive index of the  
132 number of hardships a household reported experiencing during the COVID-19 pandemic  
133 (i.e., since March of 2020); it was coded as a count variable ranging from 0 to 9. Infor-  
134 mation on household hardships were gathered from the following survey question: “Has  
135 your household been affected by any of these events since mid-March?” Responses included: job  
136 loss; nonfarm business closure; disruption of farming; disruption of livestock activities;  
137 disruption of fishing activities; increased price of farming or business inputs; decreased  
138 price of farming or business outputs, increased price of major food items consumed; and  
139 illness, injury, or death of any household member. The percentage of households that  
140 reported a given hardship is presented in Figure 2. The additive index had a Cronbach’s  
141 alpha score of 0.77 signifying high internal consistency.[35]

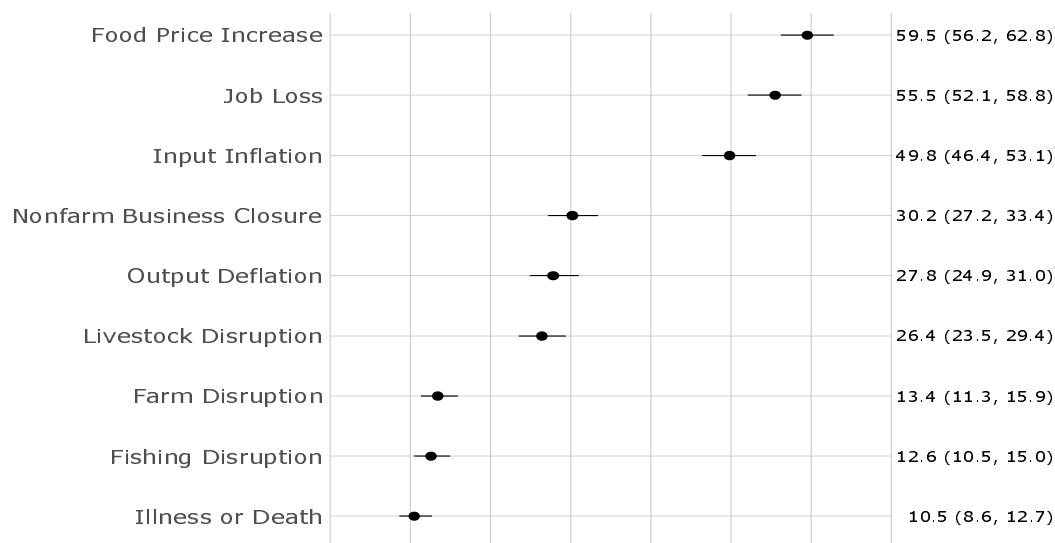

142  
143 **Figure 2. Percentage of Households that Reported a Given Hardship.** Represents the  
144 distribution of hardships used in the additive index *Household Hardships* (n = 880).

145 To create an alternative representation of hardships, we used principal components  
146 analysis (PCA) with varimax rotation to extract orthogonal factors from the variables in  
147 *Household Hardships*. The eigenvalues of the correlation matrix from PCA demonstrated  
148 that the first factor explained 40% of the variability in the data and the second explained  
149 20%. Subsequent factors explained little variability. We opted to retain the first factor,  
150 which included job loss, nonfarm business closure, farm disruption, livestock disruption,  
151 fishing disruption, and output inflation, as an index we termed *Household Disruptions*.  
152 Variables highly correlated with the factor were weighted against their eigenvector coef-  
153 ficients. Details related to the PCA results for the *Household Disruptions* are presented in  
154 Appendix A.

155 Right-hand side variables in our analyses included information on the head of house-  
156 hold, characteristics of the household and its homestead, and COVID-19 response varia-

bles. Head of household variables were *age* (coded as 1 = less than 40 years, 2 = 41 to 44 years, 3 = 45 to 60 years, and 4 = sixty years and above); *sex* (coded as male = 0 and female = 1); *ethnicity* (coded as Amhara = 1 (reference) and other = 2, which included Oromo, Somali, Gurage, Harari and Tigray); *education* (coded as no formal education = 0 (reference), any level of education = 1); *occupation* (coded as 1 = farmer/domestic (reference), 2 = student, 3 = professional, 4 = sales, 5 = daily laborer, 6 = other employment, 7 = unemployed/retired). Household variables were *urbanicity* (coded as urban (Harar) = 1 and rural (Kersa) = 0); *household size* (coded as 1 = 1-2 individuals (reference), 2 = 3-4 individuals, 3 = 5-6 individuals, 4 = 7-8 individuals, 5 = 9+ individuals); *children under age 5* (coded as 0 = no, 1 = yes); *adults over age 60* (coded as 0 = no, 1 = yes); monthly *income* (coded as 1 = 0-1,200 Birr Ethiopia Birr (reference), 2 = 1,201-2,000 Birr, 3 = 2,001-3,000 Birr, 4 = 3,001-4,600 Birr, and 5 = 4,600+); and a *wealth index* based on a list of household assets (coded as an 1 = poorest (reference), 2 = poorer, 3 = middle, 4 = richer, 5 = richest). For information on the principal components analysis used to compute the wealth index see Appendix B. Covid response variables were used to analyze associations between household hardships and community/government interventions that were implemented to stem the severity of COVID-19. Responses were gathered from the following survey question: “What steps has your community/government taken to curb the spread of the coronavirus in your area?” Intervention variables analyzed include: *lockdowns*, *travel restrictions*, *business closures*, and *intervention centers*. Each of these variables were coded Yes = 1 and No = 0.

#### 2.4. Analytic Strategy

Data cleaning and analysis was performed using R version 4.2.0.[36] Education and occupation related data from the HDSS were missing for nine household heads; these households were removed from analyses that included these variables. A series of unadjusted quasi-Poisson regression models were used to analyze associations with the additive index *Household Hardships* and also with the PCA based index *Household Disruptions* (results from the unadjusted analyses are available upon request). Adjusted quasi-Poisson regression models were then used to control for additional variables. Variables were included in the final adjusted model if their inclusion had theoretical justification. We assessed model fit with comparison of AIC and BIC scores—both scores were the smallest for the fully adjusted model, indicating that this model had superior fit compared to simpler or pathway specific models. Results are reported as Adjusted Incidence Rate Ratios (AIRR) with 95% confidence intervals (95% CI) and visualized with forest plots.[37,38] Given anticipated differences in demographic, economic, and social characteristics between populations living in urban vs. rural areas, effect modification was evaluated using interaction terms and visualized as predicted probabilities. A secondary analysis was conducted for those households that reported experiencing at least one hardship during the pandemic. This analysis used adjusted logistic regression to examine factors associated with household responses to pandemic hardships. We present results for the response strategies that were used by at least 10% of households.

### 3. Results

Only 13% of households reported not experiencing any of the measured hardships; the remaining 87% experienced at least one hardship (see Figure 3). The average number of hardships experienced during the pandemic was 2.86 with a standard deviation of 2.31; the interquartile range spanned 1 to 4 hardships. A majority of households (59.5%) observed an increase in local food prices (see Figure 2). Other common hardships included a household member losing their job (55.5%), observing increases in the cost of inputs for businesses or farms (49.8%), nonfarm business closures (30.2%), and reductions in the value of business or farming outputs (27.8%).

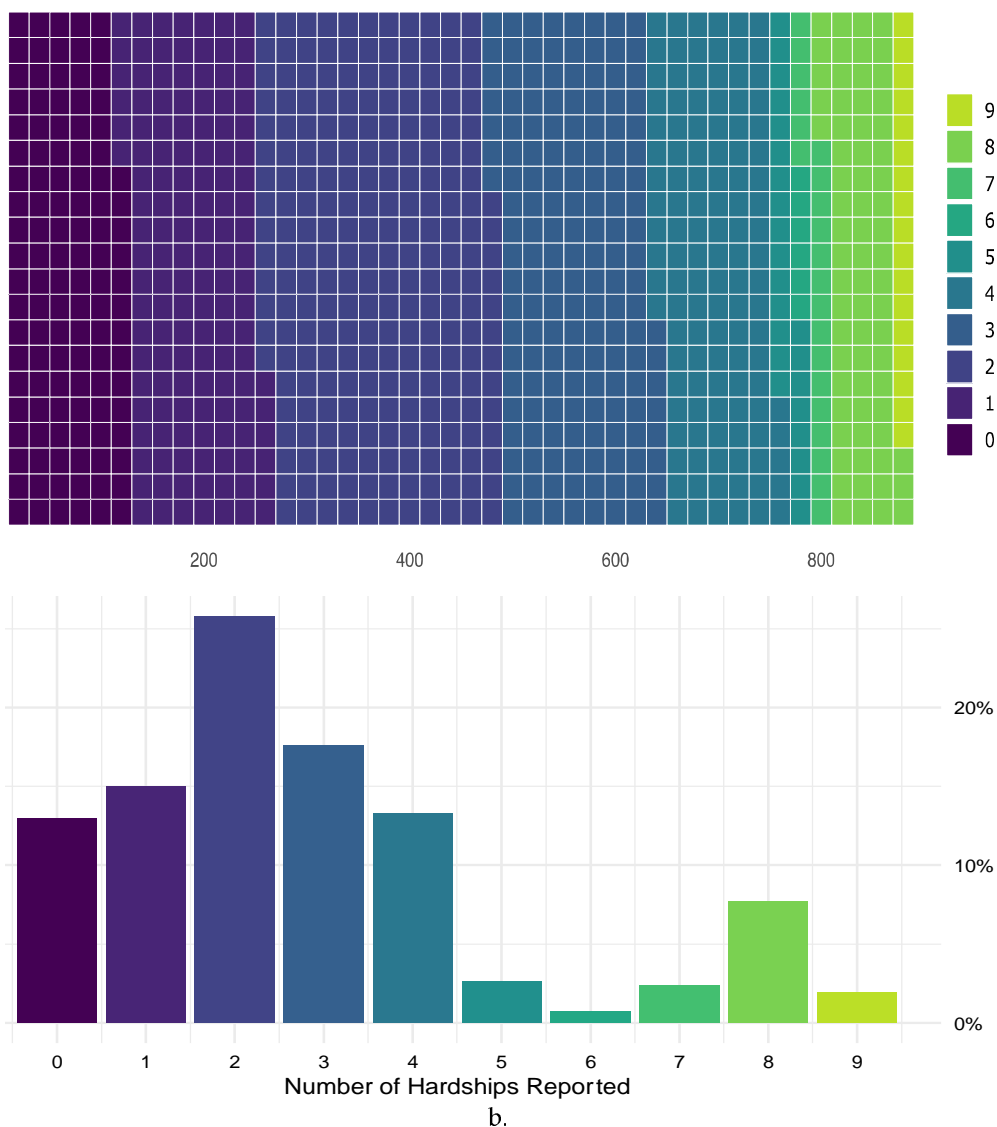

208  
209

210  
211  
212  
213  
214  
215

**Figure 3. Number of Hardships Experienced during the COVID-19 Pandemic (n = 880).** Figure 3a. presents a heat map of the number of hardships reported by the 880 sampled households. Figure 3b. presents the distribution of the additive index *Household Hardships*.

216  
217  
218  
219  
220  
221  
222  
223  
224  
225  
226

A majority of households (66%) were headed by a male household member (Table 1). Average age of the household head was 43 years with a standard deviation of 15. Roughly a quarter of household heads were from the Amhara ethnic group. A majority (58%) of household heads had obtained some level of education; their most common occupations were farmer (46%) and professional (27%). The median number of household members was 5 with a standard deviation of 2.4. Roughly a third of households reported having at least one child under the age of 5 and 27% of households had at least one adult family member over the age of 60. The most commonly reported government/community responses to the pandemic were business closures (48%) followed by travel restrictions (46%) and the establishment of isolation centers (44%).

Table 1. Descriptive Statistics (n = 880)

|                                          |                    | Urbanicity |     |       |     |       |     | $\chi^2$ | p-value |
|------------------------------------------|--------------------|------------|-----|-------|-----|-------|-----|----------|---------|
|                                          |                    | Total      | %   | Urban | %   | Rural | %   |          |         |
| <b>Head of Household Characteristics</b> |                    |            |     |       |     |       |     |          |         |
| Age                                      | <40                | 218        | 25% | 105   | 24% | 113   | 26% | 0.8      | 0.853   |
|                                          | 41-50              | 265        | 30% | 136   | 31% | 129   | 29% |          |         |
|                                          | 51-60              | 179        | 20% | 87    | 20% | 92    | 21% |          |         |
|                                          | 60+                | 218        | 25% | 112   | 25% | 106   | 24% |          |         |
| Sex                                      | Female             | 303        | 34% | 192   | 44% | 111   | 25% | 33.0     | <0.001  |
|                                          | Male               | 577        | 66% | 248   | 56% | 329   | 75% |          |         |
| Ethnicity                                | Amhara             | 222        | 25% | 192   | 44% | 30    | 7%  | 158.1    | <0.001  |
|                                          | Other              | 658        | 75% | 248   | 56% | 410   | 93% |          |         |
| Education                                | Some Education     | 510        | 58% | 78    | 18% | 283   | 65% | 201.0    | <0.001  |
|                                          | No Education       | 361        | 41% | 360   | 82% | 150   | 35% |          |         |
| Occupation                               | Farmer/Domestic    | 401        | 46% | 89    | 20% | 312   | 72% | 255.2    | <0.001  |
|                                          | Student            | 59         | 7%  | 34    | 8%  | 25    | 6%  |          |         |
|                                          | Professional/Sales | 236        | 27% | 186   | 42% | 50    | 12% |          |         |
|                                          | Daily Laborer      | 67         | 8%  | 53    | 12% | 14    | 3%  |          |         |
|                                          | Other work         | 21         | 2%  | 8     | 2%  | 13    | 3%  |          |         |
|                                          | Unemployed/Retire  | 87         | 10% | 68    | 16% | 19    | 4%  |          |         |
| <b>Household Characteristics</b>         |                    |            |     |       |     |       |     |          |         |
| Household Size                           | 1-2                | 146        | 17% | 94    | 21% | 52    | 12% | 99.0     | <0.001  |
|                                          | 3-4                | 257        | 29% | 168   | 38% | 89    | 20% |          |         |
|                                          | 5-6                | 247        | 28% | 122   | 28% | 125   | 28% |          |         |
|                                          | 7-8                | 171        | 19% | 37    | 8%  | 134   | 30% |          |         |
|                                          | 9+                 | 59         | 7%  | 19    | 4%  | 40    | 9%  |          |         |
| Children Under Age 5                     | No                 | 578        | 66% | 322   | 73% | 256   | 58% | 22.0     | <0.001  |
|                                          | Yes                | 302        | 34% | 118   | 27% | 184   | 42% |          |         |
| Adults Over Age 60                       | No                 | 644        | 73% | 306   | 70% | 338   | 77% | 6.0      | 0.015   |
|                                          | Yes                | 236        | 27% | 134   | 30% | 102   | 23% |          |         |
| Income (Birr)                            | 4,600+             | 172        | 20% | 125   | 28% | 49    | 11% | 55.1     | <0.001  |
|                                          | 3,001 - 4,600      | 132        | 15% | 71    | 16% | 63    | 14% |          |         |
|                                          | 2,001 - 3,000      | 165        | 19% | 75    | 17% | 93    | 21% |          |         |
|                                          | 1,201 - 2,000      | 209        | 24% | 73    | 17% | 137   | 31% |          |         |
|                                          | 0 - 1,200          | 192        | 22% | 96    | 22% | 97    | 22% |          |         |
| Wealth Index                             | Richest            | 180        | 20% | 95    | 22% | 85    | 19% | 13.4     | 0.009   |
|                                          | Richer             | 174        | 20% | 87    | 20% | 87    | 20% |          |         |
|                                          | Middle             | 174        | 20% | 72    | 16% | 102   | 23% |          |         |
|                                          | Poorer             | 176        | 20% | 81    | 18% | 95    | 22% |          |         |
|                                          | Poorest            | 176        | 20% | 105   | 24% | 71    | 16% |          |         |
| <b>Covid Response</b>                    |                    |            |     |       |     |       |     |          |         |
| Business Closures                        | No                 | 461        | 52% | 228   | 52% | 233   | 53% | 0.1      | 0.736   |
|                                          | Yes                | 419        | 48% | 212   | 48% | 207   | 47% |          |         |
| Isolation Centers                        | No                 | 497        | 56% | 253   | 58% | 244   | 55% | 0.4      | 0.541   |
|                                          | Yes                | 383        | 44% | 187   | 43% | 196   | 45% |          |         |
| Lockdowns                                | No                 | 502        | 57% | 264   | 60% | 238   | 54% | 3.1      | 0.077   |
|                                          | Yes                | 378        | 43% | 176   | 40% | 202   | 46% |          |         |
| Travel Restrictions                      | No                 | 474        | 54% | 227   | 52% | 247   | 56% | 1.8      | 0.176   |
|                                          | Yes                | 406        | 46% | 213   | 48% | 193   | 44% |          |         |

n= 880.

Data source: CHAMPS Ethiopia Lockdown Module data and CHAMPS Ethiopia Health and Demographic Surveillance data.

Notes: Nine observations were missing for head of household's education and occupation. One observation was missing for whether a household had experienced food insecurity prior to the onset of COVID-19. The "other" category for ethnicity included: Oromo, Somali, Gurage, Harari, Tigray, and "other". One observation was missing for whether a household had experienced food insecurity prior to the onset of COVID-19.

### 3.1. Factors Associated with Household Hardships

227  
228  
229  
230  
231  
232  
233

234

235 After adjusting for other variables (see Figure 4), households were more likely to report  
236 hardships during the pandemic if the household resided in a rural compared to an urban  
237 area (AIRR = 1.34, 95% CI [1.20, 1.49]). Compared to households with 1 to 2 household  
238 members, larger households were also more likely to report hardships during the pan-  
239 demic; for example, for households with 7-8 members, the AIRR for experiencing hard-  
240 ships during the pandemic was 1.42 (95% CI [1.24, 4.65]). In contrast, households were  
241 less likely to report experiencing hardships during the pandemic if the household head  
242 had at least some education compared to none (AIRR = 0.87, 95% CI [0.79, 0.96]); was  
243 employed in a professional occupation (AIRR = 0.75, 95% CI [0.66, 0.84]) or as a day la-  
244 borer (AIRR = 0.74, 95% CI [0.62, 0.88]) compared to employment in agriculture; had a  
245 monthly household income greater than 1,200 Birr (for example, the AIRR for experi-  
246 encing hardships during the pandemic for households with a monthly income greater  
247 than 4,600 Birr was 0.57 (95% CI [0.49, 0.66])); or were wealthier compared to the poorest  
248 households. Households were also more likely to report experiencing hardships during  
249 the pandemic if they also reported local community/government implementation of  
250 lockdowns (AIRR = 1.29, 95% CI [1.14, 1.46]), travel restrictions (AIRR = 1.38, 95% CI  
251 [1.23, 1.56]), and the establishment of isolations centers (AIRR = 1.17, 95% CI [1.03, 1.33]).  
252 The age, sex, and ethnicity of the household head as well as the presence of children  
253 under the age of 5 or adults older than age 60 in the household were not associated with  
254 household hardships after adjusting for other variables. Results from the analysis of the  
255 *Household Disruptions* index (Figure 5) were generally consistent with the results from  
256 analyzing the *Household Hardships* index.

257 Baseline predicted probabilities of household experiences with hardships during the  
258 pandemic based on *urbanicity* (urban vs. rural residence) as well as probabilities esti-  
259 mated from models including interaction terms with other variables are presented as a  
260 facet grid in Figure 6. The top facet presents the elevated probability of experiencing  
261 hardships during the pandemic for households living in a rural compared to an urban  
262 area while holding all other variables at their mean. These baseline probabilities were  
263 estimated using results from the analytic model presented in Figure 5. The remaining  
264 facets present predicted probabilities estimated from models that included statistically  
265 significant interaction terms between *urbanicity* and other variables associated with  
266 *Household Hardships* while holding all adjusting variables at their mean. The predicted  
267 probabilities indicate that households with a household head that identified as an ethnic  
268 group other than the Amhara or had no education were primarily at greater risk of ex-  
269 perience hardships if they were residing in a rural area compared to an urban area.  
270 Dramatic dose responses of higher probability for experiencing hardships are seen for  
271 larger households, households with lower income, and households with lower wealth  
272 that were residing in a rural area compared to an urban area. In contrast, while the over-  
273 all probability of experiencing hardships was higher for households living in a rural area,  
274 local implementation of lockdowns and business closures as a response to the pandemic  
275 were only associated with higher probability of experiencing hardships for those  
276 households living in an urban area.



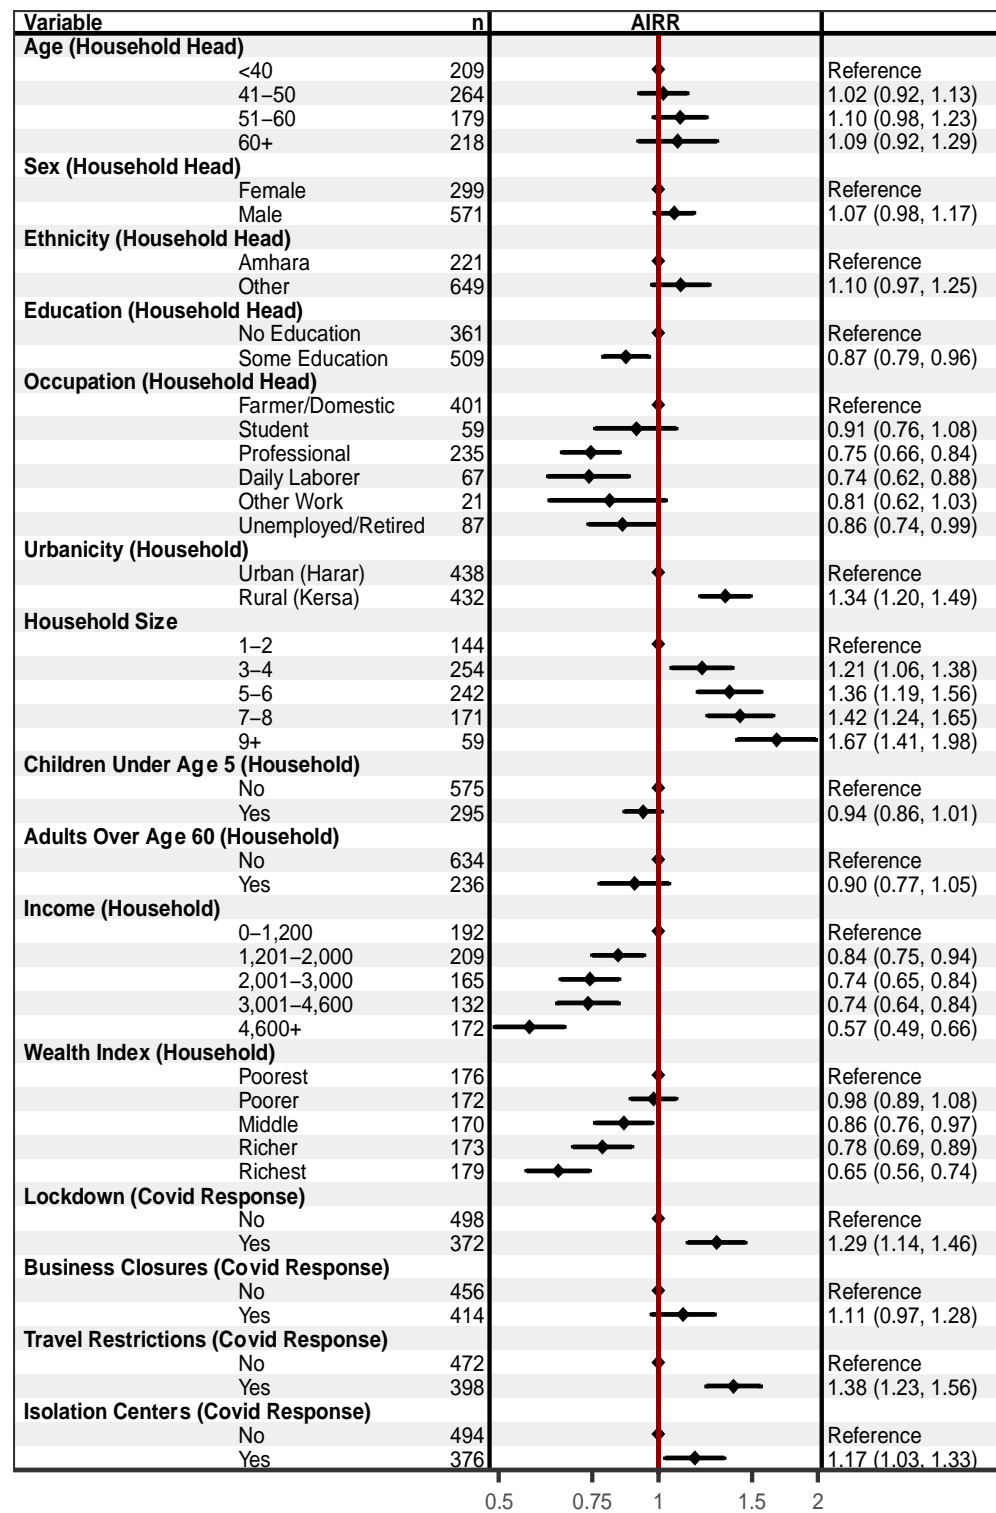

Figure 4. Adjusted Association with Household Hardships presented as Adjusted Incidence Rate Ratios (AIRR). The forest plot presents AIRRs with 95% confidence intervals from a multivariate quasi-Poisson regression model. The AIRRs were adjusted for the other variables included in the model. Education and Occupation had 9 missing values; Income had one outlier set to missing. (n=870)

277  
278  
279  
280  
281  
282

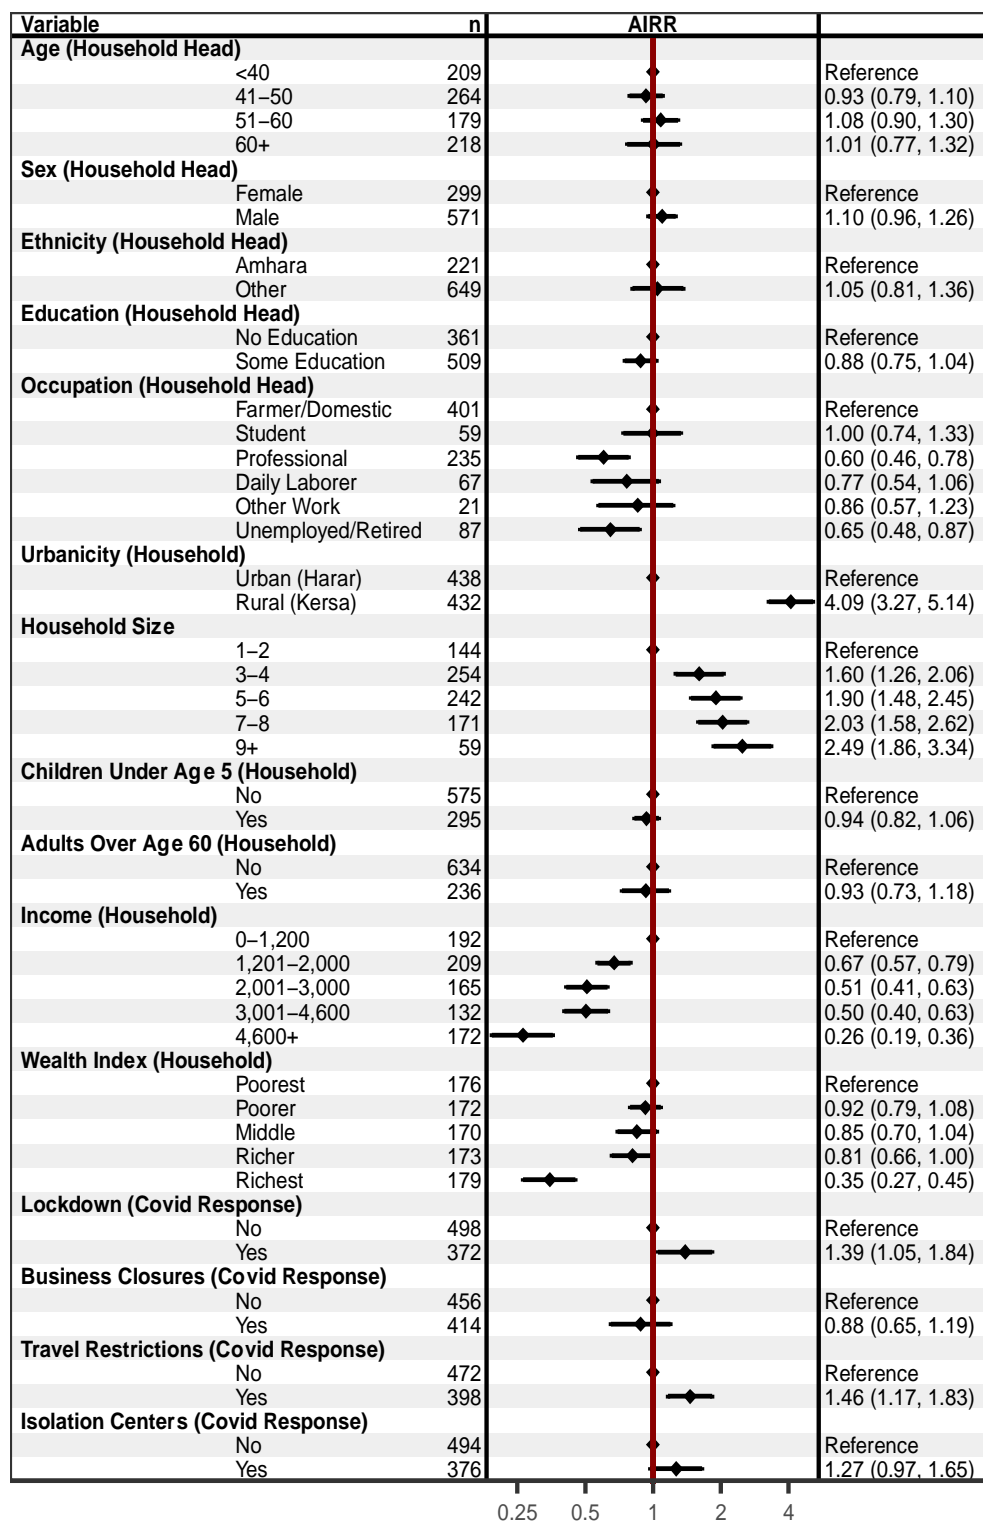

Figure 5. Adjusted Associations with Household Disruptions presented as Adjusted Incidence Rate Ratios (AIRR). The forest plot presents AIRRs with 95% confidence intervals from a multivariate quasi-Poisson regression model. The AIRRs were adjusted for the other variables included in the model. Education and Occupation had 9 missing values; Income had one outlier set to missing. (n=870)

283  
284  
285  
286  
287  
288  
289

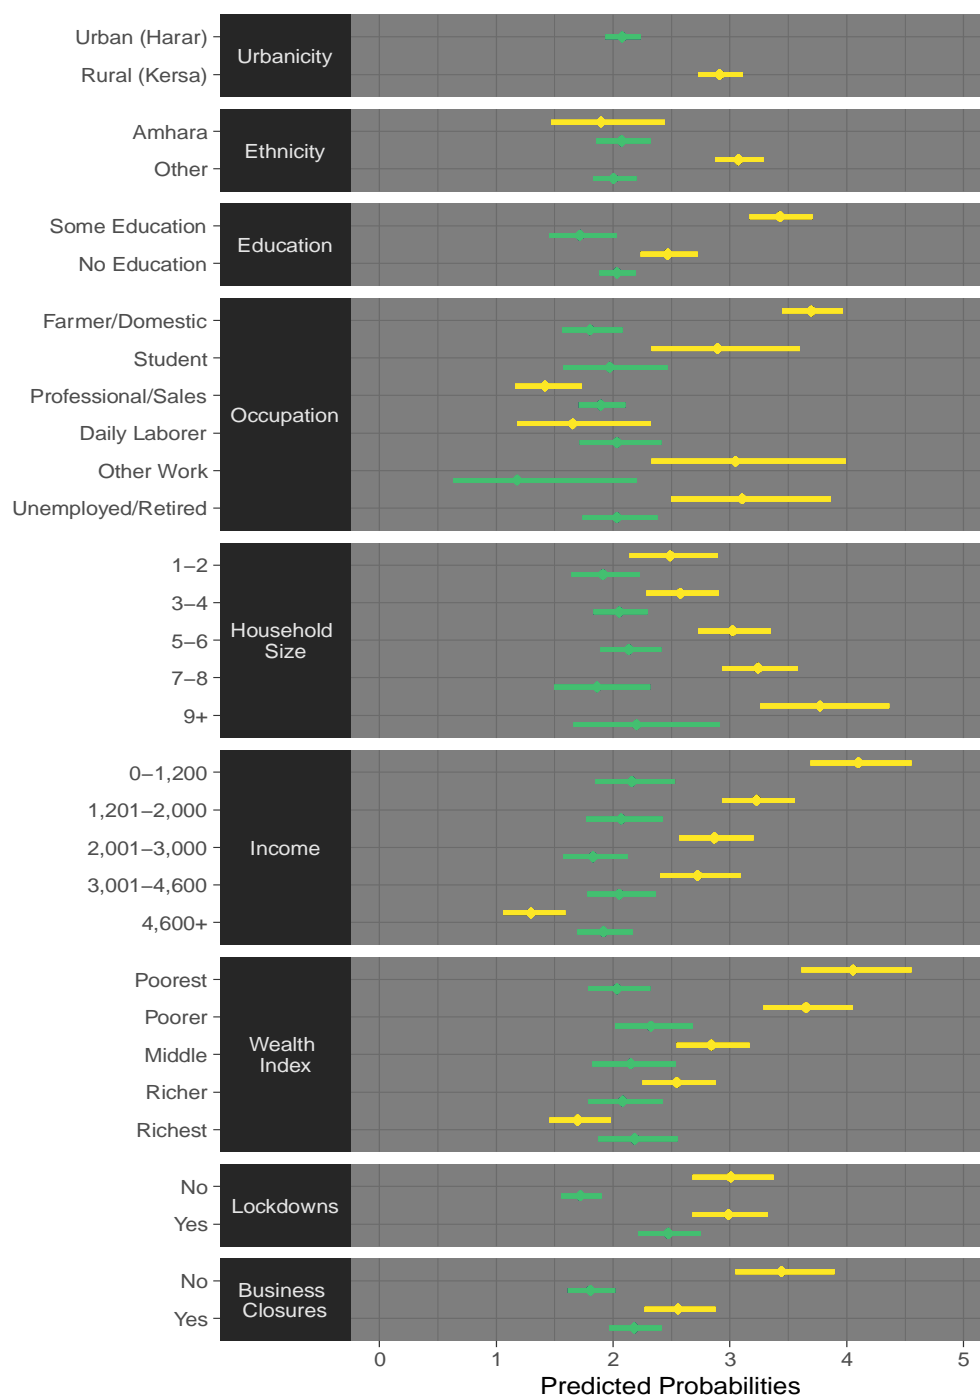

290  
291  
292  
293  
294  
295  
296  
297  
298  
299  
300

**Figure 6. Evaluating Effect Modification between Urbanicity and other Factors Associated with Household Hardships.** The figure presents a facet grid of predicted probabilities from multiple analytic models. The top facet presents the predicted probabilities for household residence in an urban (represented in green) vs. rural (represented in yellow) area, holding all other variables at their mean, to establish the baseline probabilities for households living in either of the two communities. The probabilities for this baseline were estimated using the results from the model presented in Figure 5. The remaining facets present predicted probabilities estimated from models that included interaction terms between urbanicity and other variables associated with Household Hardships while holding all adjusting variables at their mean.

301

### 3.2. Factors Associated with Household Responses to Hardships

302

The most common household response to experiencing at least once hardship during the pandemic was reducing food consumption, which was reported by 24.4% of affected households (see Figure 7). Other common responses included selling household assets (21.4%), seeking means to generate additional income (20.5%), seeking help from family or friends (14.0%), and borrowing from family or friends (10.6%).

303

304

305

306

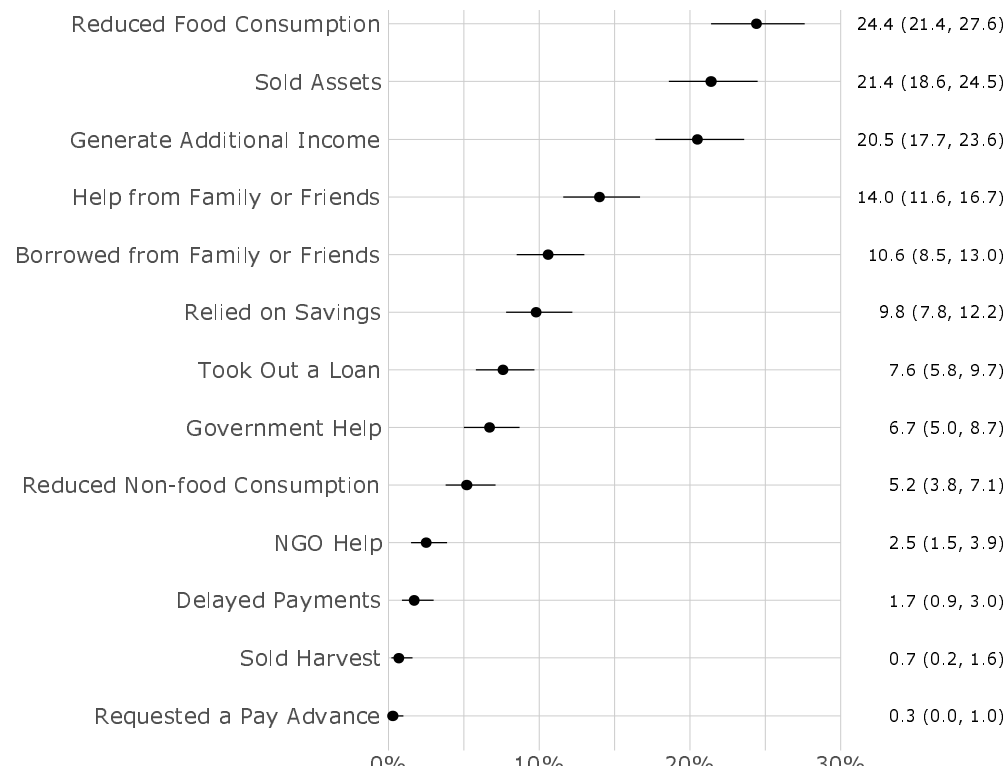

307

**Figure 7. Percentage of Households that Experienced a Given Hardship during the COVID-19 Pandemic (n = 766).**

308

309

310

Comprehensive results for the analyses examining factors associated with household responses to pandemic related hardships are presented in Figures A1 – A5 (see Appendix C). After adjusting for other variables, including other potential hardships, households that had a member lose their job were more likely to report reducing food consumption (AOR = 1.75, 95% CI [1.06, 2.92]); selling assets (AOR = 3.19, 95% CI [1.30, 8.41]); seeking to generate additional income (AOR = 2.82, 95% CI [1.55, 5.25]); seeking help from family and friends (AOR = 2.20, 95% CI [1.28, 3.83]); and borrowing from family or friends (AOR = 5.80, 95% CI [2.61, 13.82]). Households that observed increases in the costs of business or farming inputs were more likely to report reducing food consumption (AOR = 2.77, 95% CI [1.51, 5.20]); selling assets (AOR = 9.24, 95% CI [3.82, 23.96]); seeking help from family and friends (AOR = 3.45, 95% CI [1.80, 6.82]); and borrowing from family or friends (AOR = 5.54, 95% CI [2.30, 14.06]). Observing increased food prices was associated with households selling assets (AOR = 2.36, 95% CI [1.12, 4.96]). Households that had a member close their business during the pandemic were less likely to report selling assets (AOR = 0.08, 95% CI [0.02, 0.29]). Households that experienced farming disruptions were more likely to report seeking to generate additional income (AOR = 24.79, 95% CI [7.26, 97.71]). Households residing in a rural vs. an urban area were more likely to use all of the measured strategies to mitigate experiencing hardships associated with the pandemic—these associations were robust to adjusting for other variables.

311

312

313

314

315

316

317

318

319

320

321

322

323

324

325

326

327

328

329  
330  
331  
332  
333  
334  
335  
336  
337  
338  
339  
340  
341  
342  
343  
344  
345  
346  
347  
348  
349  
350  
351  
352  
353  
354  
355  
356  
357  
358  
359  
360  
361  
362  
363  
364  
365  
366  
367  
368  
369  
370  
371  
372  
373  
374  
375  
376  
377  
378

#### 4. Discussion

In this study, we examined the prevalence of household hardships during the COVID-19 pandemic in a rural and an urban community in Eastern Ethiopia. We further examined demographic, economic, and social characteristic associated with these hardships as well as strategies households used to mitigate the severity of these hardships. Almost 90% of households reported experiencing at least one hardship since the onset of the pandemic; 75% of households reported experiencing at least 4 distinct hardships. Risk factors for experiencing these hardships included inequalities across demographic, economic, and social characteristics, but also place inequalities. Households that were already struggling prior to the onset of the pandemic were at greatest risk for experiencing additional hardships—residing in a rural area magnified the strength of the associations for several household level risk factors.

Households were more likely to report hardships if the head of household had no education or worked as a farmer or in a domestic/subsistence occupation. Households were also more likely to report experiencing hardships if they resided in a rural vs. an urban area, had a larger number of household members, had less monthly income, and were poorer compared to other households in the community. The pattern of association for both monthly income and household wealth is suggestive of a dose response; households with less wealth and less monthly income were at significantly higher risk for experiencing hardships. These associations are consistent with risk factors reported in studies from other resource limited countries and early stage research from Ethiopia.[6,10-13,17] Community responses to the pandemic associated with hardships included lockdowns and travel restrictions; business closures were only associated with experiencing hardships for households residing in an urban area. Future interventions that seek to mitigate negative consequences associated with pandemics mitigation efforts should anticipate these characteristics as important risk factors and target interventions to aid vulnerable groups.

Loss of employment for a household member and observation of increasing costs of business or farming inputs were both associated with the broadest combination of household responses to pandemic hardships. Patterns of association between demographic, economic, and social characteristics and household response strategies were inconsistent; however, compared to urban households, rural households were more likely to implement each of the measured response strategies, even after adjusting for demographic, economic, and social characteristics as well as the various pandemic related hardships.

The empirical findings from this study are not generalizable outside of the communities under study; while we acknowledge this limitation, we note that it is common to studies using HDSS data.[16] As an observational study, other potential limitations include unmeasured variable bias (for example, having data on household participation in Ethiopia's Productive Safety Net Program (PSNP) may have helped contextualize our results) or recall bias due to the extended length of time considered in the study (i.e., some respondents may have forgotten hardships that occurred closer to onset of the pandemic). As a cross-sectional study, we cannot draw causal inferences. Results from other studies suggest hardships associated with the COVID-19 pandemic are temporary.[7] Looking forward, scholars should collect and analyze longitudinal data to evaluate hardship events over time. In the context of demographic surveillance systems, follow-up data collection using the same survey instrument is easy to attach to subsequent rounds of data collection already being fielded. A further limitation, common to studies involving humanitarian crises, is that we are unable to differentiate between the effects of the pandemic and that of the political tension in the northern region of Ethiopia.[26] How-

379 ever, it is noteworthy that the northern region is more than 400 km away from the study  
380 communities.

## 381 **5. Conclusions**

382 Households living in the rural area of Kersa were at greater risk of experiencing a variety  
383 of hardships during the COVID-19 pandemic, even after adjusting for demographic,  
384 economic, and social risk factors. Moreover, the strength of the associations between  
385 household hardships and demographic, economic, and social risk factors was greater for  
386 households residing in the rural area of Kersa compared to the urban area of Harar.  
387 These results suggest an enduring urban vs. rural divide that amplifies the effects of  
388 household level socioeconomic inequalities. Interventions seeking to ameliorate conse-  
389 quences of lockdowns and other efforts implemented to stem disease spread should seek  
390 to address place inequalities associated with rural areas as distinct from, but also inter-  
391 acting with, household level risk factors. These finding may inform future policies and  
392 practices aiming to mitigate negative consequences of COVID-19 and future disease  
393 outbreaks.

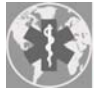

394  
395  
396  
397  
398  
399  
400  
401  
402  
403  
404  
405  
406  
407  
408  
409  
410  
411  
412  
413  
414  
415  
416  
417  
418  
419  
420  
421

**Supplementary Materials:** The following supporting information can be downloaded at: [www.mdpi.com/xxx/s1](http://www.mdpi.com/xxx/s1), Figure S1: title; Table S1: title; Video S1: title.

**Author Contributions:** For research articles with several authors, a short paragraph specifying their individual contributions must be provided. The following statements should be used “Conceptualization, J.M., S.C., N.A., and M.D.; methodology, J.M., S.C., N.A., and M.D.; software, J.M.; validation, J.M., N.A., and M.D.; formal analysis, J.M. and Z.M.; investigation, J.M., Z.M., S.C., N.A., T.G., G.M., and M.D.; resources, J.M., Z.M., C.M., S.C., N.A., T.G., G.M., and M.D.; data curation, N.A., T.G., G.M., and M.D.; writing—original draft preparation, J.M.; writing—review and editing, J.M., Z.M., C.M., S.C., N.A., and M.D.; visualization, J.M. and Z.M.; supervision, C.M., S.C., and N.A.; project administration, J.M. and M.D.; funding acquisition, C.M. All authors have read and agreed to the published version of the manuscript.”

**Funding:** This work was supported, in whole or in part, by grant OPP1126780 from the Bill & Melinda Gates Foundation to Dr Cynthia Whitney. Under the grant conditions of the Foundation, a Creative Commons Attribution 4.0 Generic License has already been assigned to the Author Accepted Manuscript version that might arise from this submission.

**Institutional Review Board Statement:** This study was conducted according to the guidelines laid down in the Declaration of Helsinki and all procedures involving research study participants were approved by the human subjects ethical committee of Haramaya University.

**Informed Consent Statement:** Informed consent was obtained from all subjects involved in the study.

**Data Availability Statement:** The data presented in this study are available on request from the corresponding author. The data are not publicly available due to restrictions.

**Acknowledgments:** In this section, you can acknowledge any support given which is not covered by the author contribution or funding sections. This may include administrative and technical support, or donations in kind (e.g., materials used for experiments).

**Conflicts of Interest:** None.

**Disclaimers:** The findings and conclusions in this report are those of the authors and do not necessarily represent the views of the US Centers for Disease Control and Prevention.

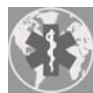

## Appendix A

| <b>Table S1. Principal components factor analysis of hardship variables</b> |                |
|-----------------------------------------------------------------------------|----------------|
| Variable                                                                    | Factor Pattern |
| Job loss                                                                    | 0.60           |
| Nonfarm business closure                                                    | 0.87           |
| Farm disruption                                                             | 0.79           |
| Livestock disruption                                                        | 0.92           |
| Fishing disruption                                                          | 0.80           |
| Output deflation                                                            | 0.87           |
| <i>Eigenvalue</i>                                                           | 4.00           |
| Explained variance                                                          | 40%            |



423

## Appendix B

424

### Wealth Index Generation

425

A wealth index was generated based on a collection of assets and construction materials for the main dwelling of a given household. To generate the index, we followed recommendations from the DHS and the World Food Programme (WFP) that summarize steps for calculating an asset based wealth index,[42-44] including coding instructions for Stata,[45] and an adaptation of this coding process implemented in R.[29,46] Using these documents to guide us, we generated our wealth index by identifying a list of household assets for inclusion in our index computation, recoded all household assets into dichotomous variables; recoded dwelling materials into improved vs. non-improved dichotomous variables; divided our sample into rural and urban subsamples and assessed level of representation of a given variable within the rural and urban subsamples (per WFP recommendations, a given variable was included in further calculations if percent ownership ranged between 5 and 95 percent); employed principal components analysis with varimax rotation to calculate component scores for those households living in either rural or urban areas, which explained 45% of the variation in both subsamples; extracted and combined the PCA scores of the first component from the urban and rural subsamples; and finally organized the scores into wealth quintiles to generate a composite asset index. The resulting wealth quintiles are presented in Figure (4). The distribution of assets owned by households as well as the materials used for constructing a household's residence are presented as percentages in Figure (5).

444

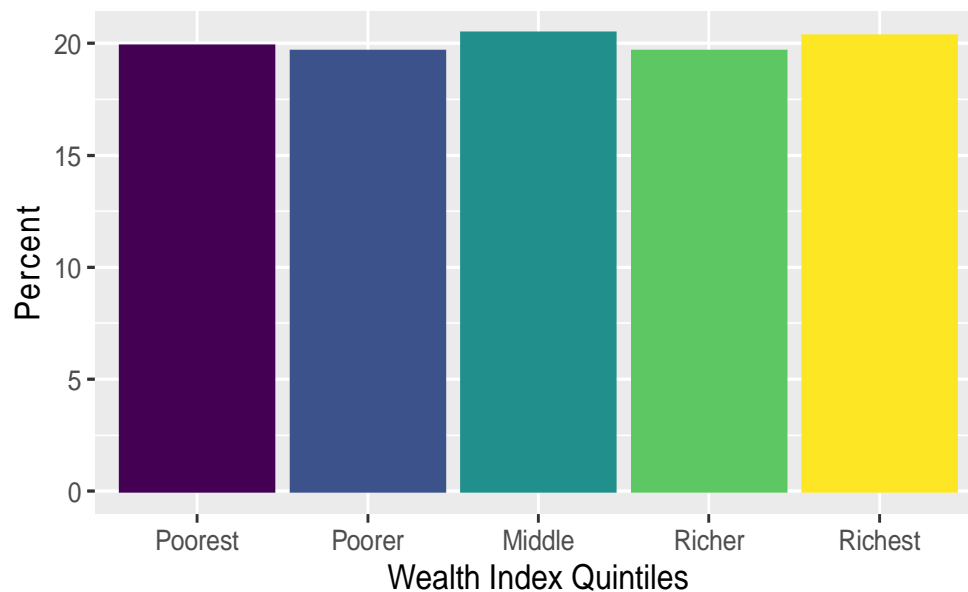

445

Figure 7. Household Wealth Index Distribution

446

447

448

449

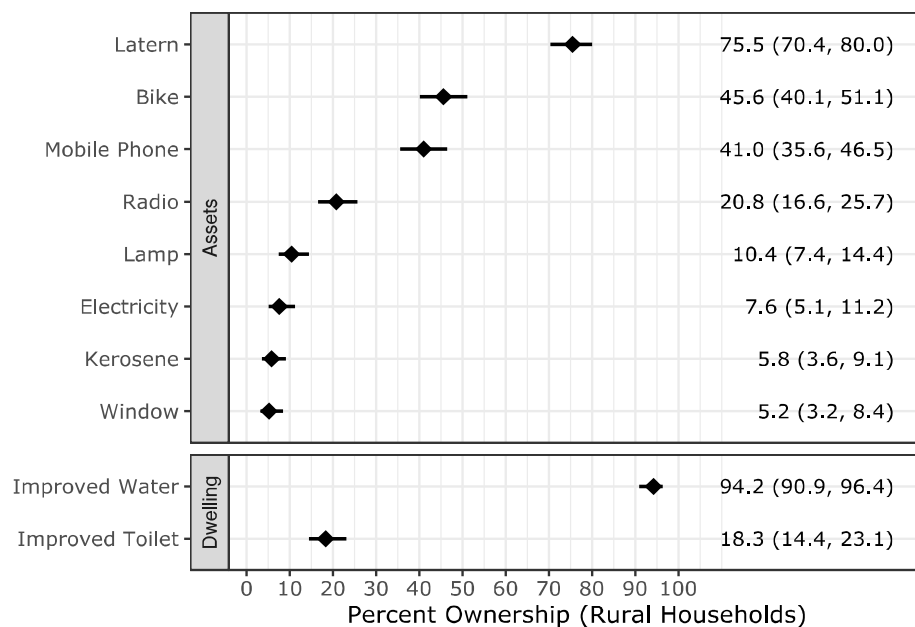

450

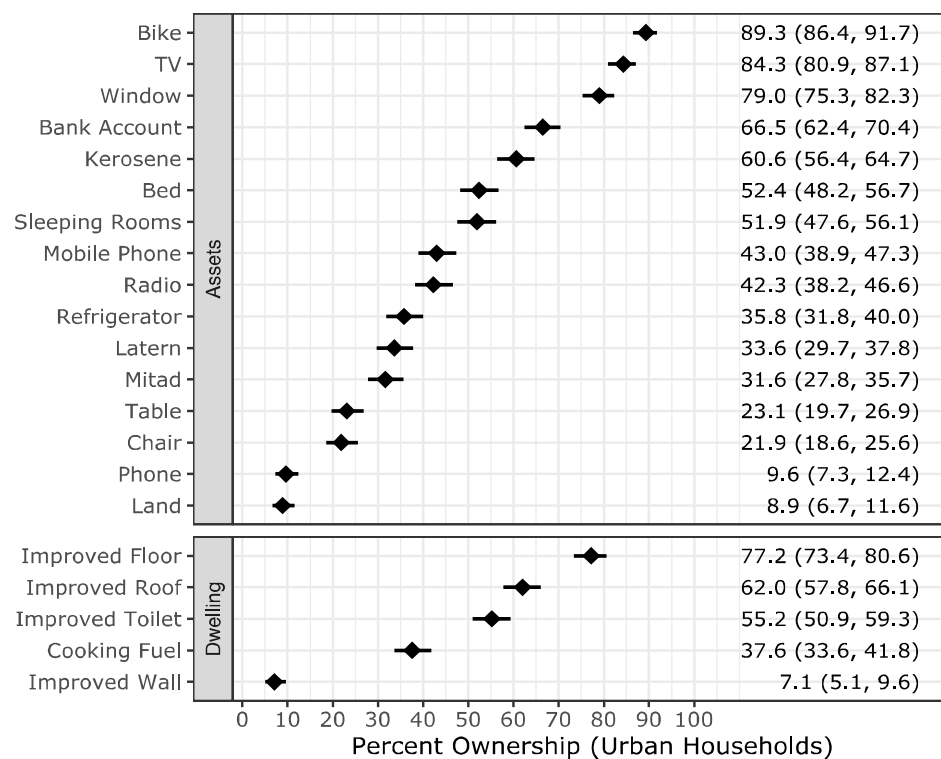

451

452

453

**Figure 8.** Households Asset Ownership and Dwelling Construction Materials included in Wealth Index

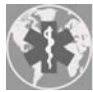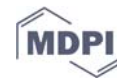

454

Appendix C

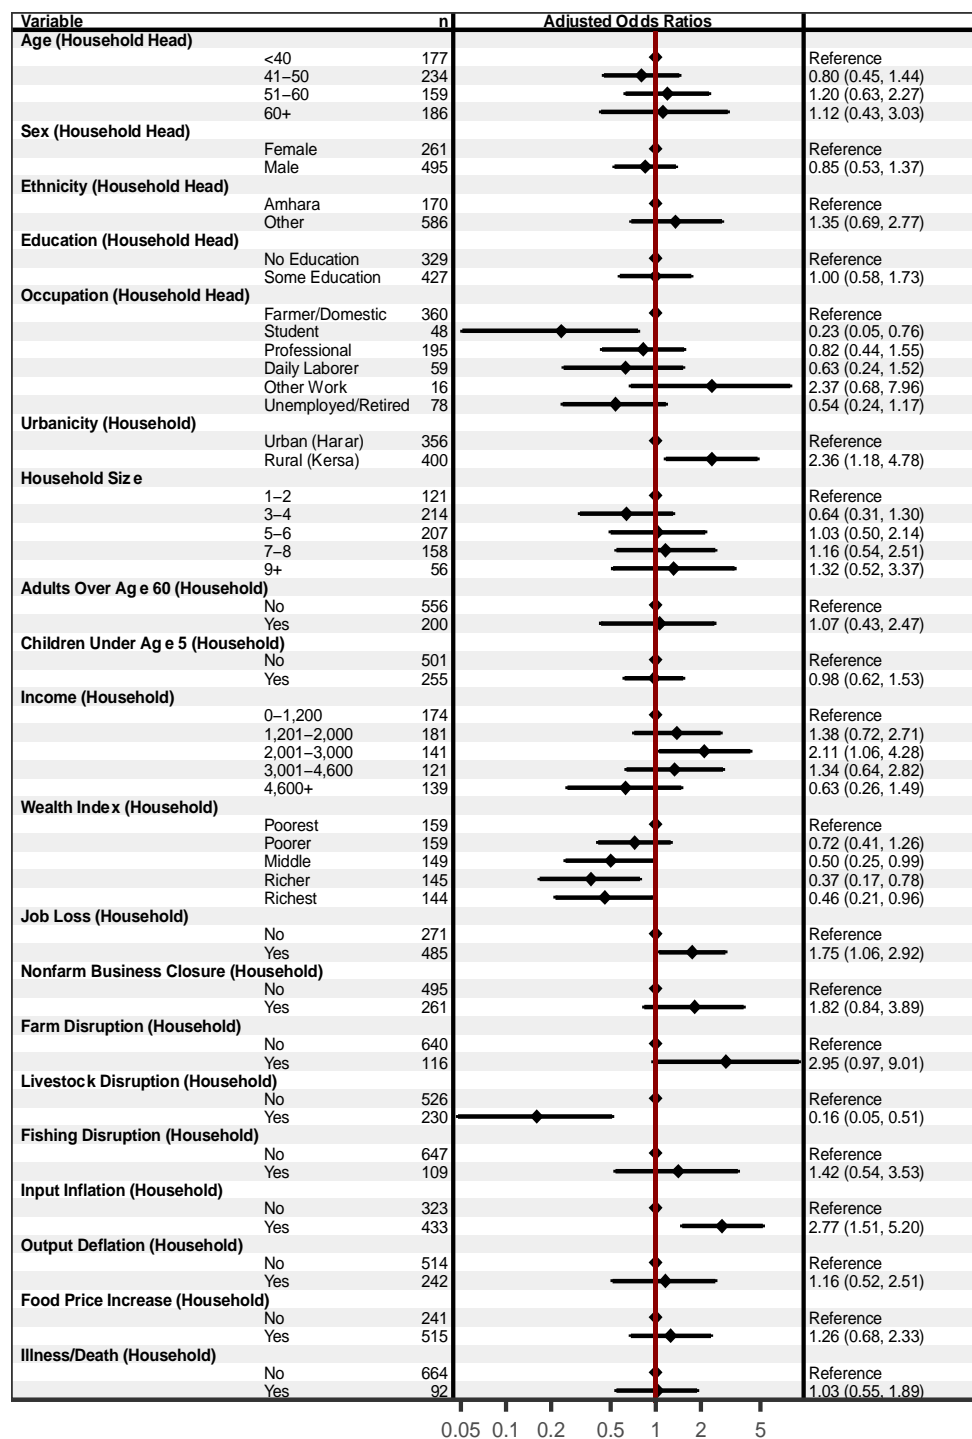

455

456

457

458

459

460

Figure A1. Adjusted Associations with *Reduced Food Consumption* presented as Adjusted Odds Ratios (AOR). The forest plot presents AORs with 95% confidence intervals from an adjusted logistic regression model. The AORs were adjusted for the other variables included in the model. Education and Occupation had 9 missing values; Income had one outlier set to missing. (n=756)

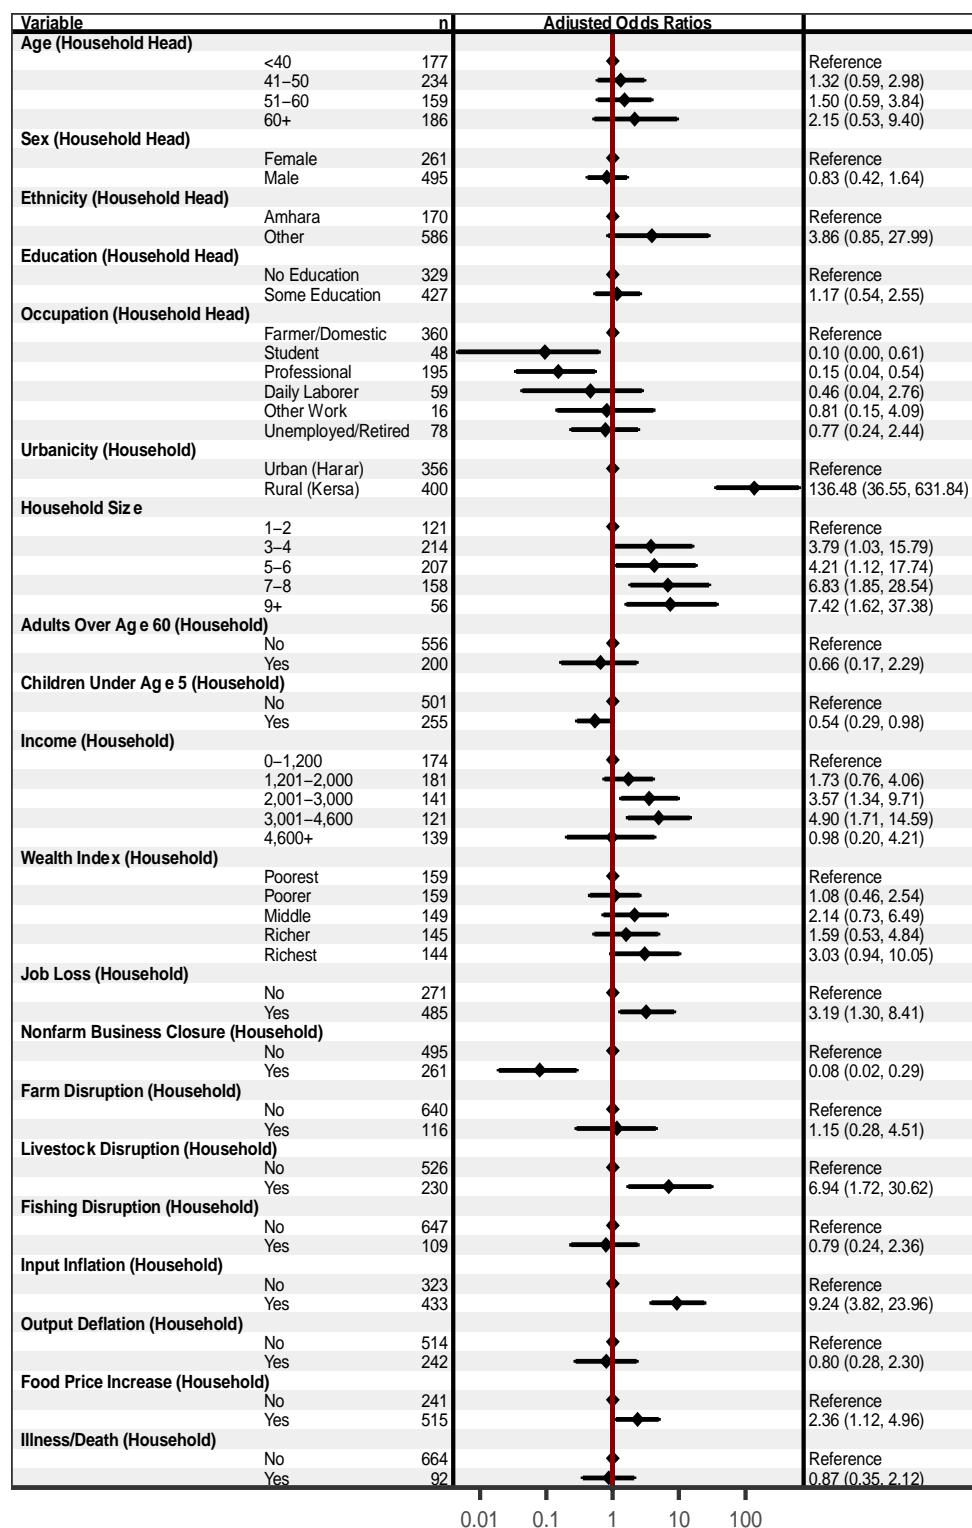

461  
462  
463  
464  
465  
466

Figure A2. Adjusted Associations with *Sold Assets* presented as Adjusted Odds Ratios (AOR). The forest plot presents AORs with 95% confidence intervals from an adjusted logistic regression model. The AORs were adjusted for the other variables included in the model. Education and Occupation had 9 missing values; Income had one outlier set to missing. (n=756)

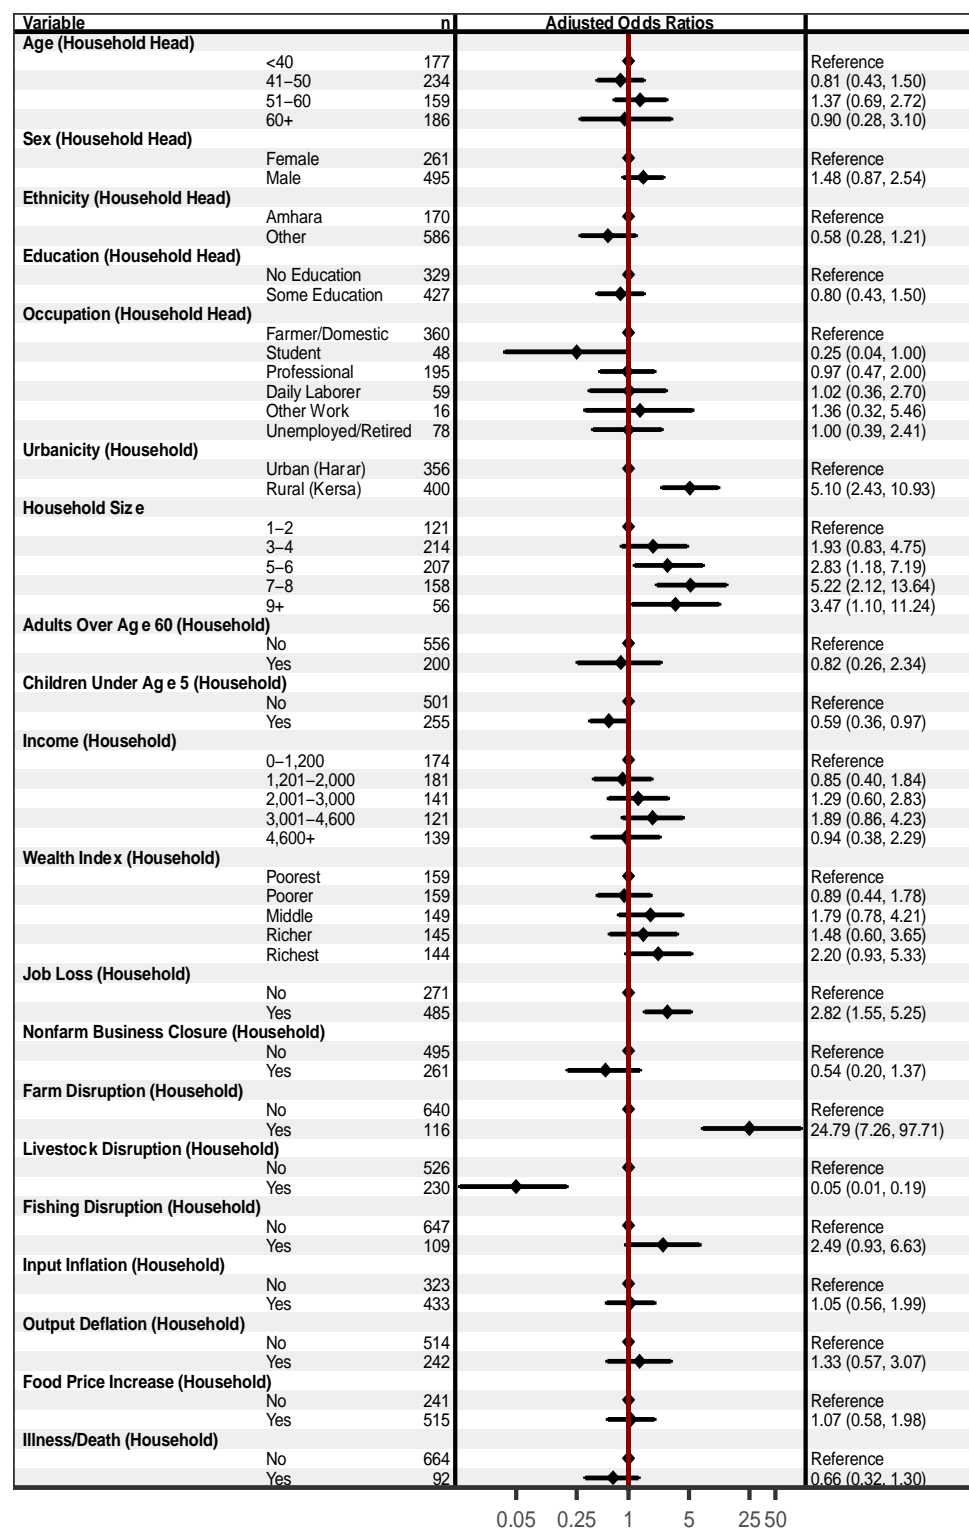

467  
468  
469  
470  
471  
472

Figure A3. Adjusted Associations with *Sought to Generate Additional Income* presented as Adjusted Odds Ratios (AOR). The forest plot presents AORs with 95% confidence intervals from an adjusted logistic regression model. The AORs were adjusted for the other variables included in the model. Education and Occupation had 9 missing values; Income had one outlier set to missing. (n=756)

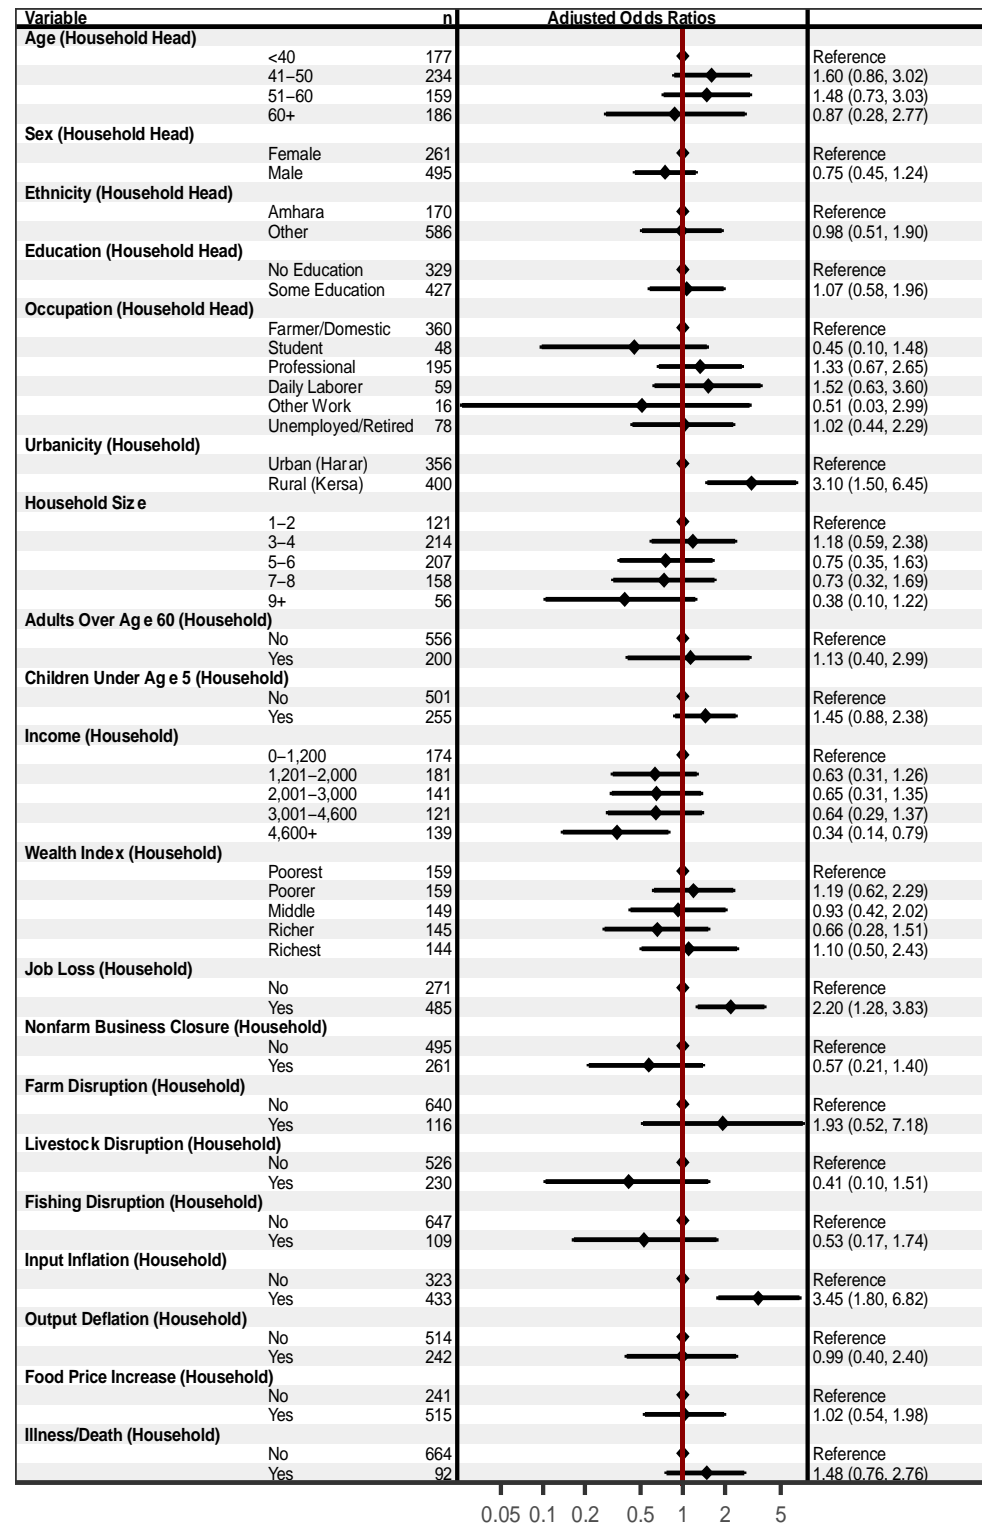

473  
474  
475  
476  
477  
478

Figure A4. Adjusted Associations with *Sought Help from Family or Friends* presented as Adjusted Odds Ratios (AOR). The forest plot presents AORs with 95% confidence intervals from an adjusted logistic regression model. The AORs were adjusted for the other variables included in the model. Education and Occupation had 9 missing values; Income had one outlier set to missing. (n=756)

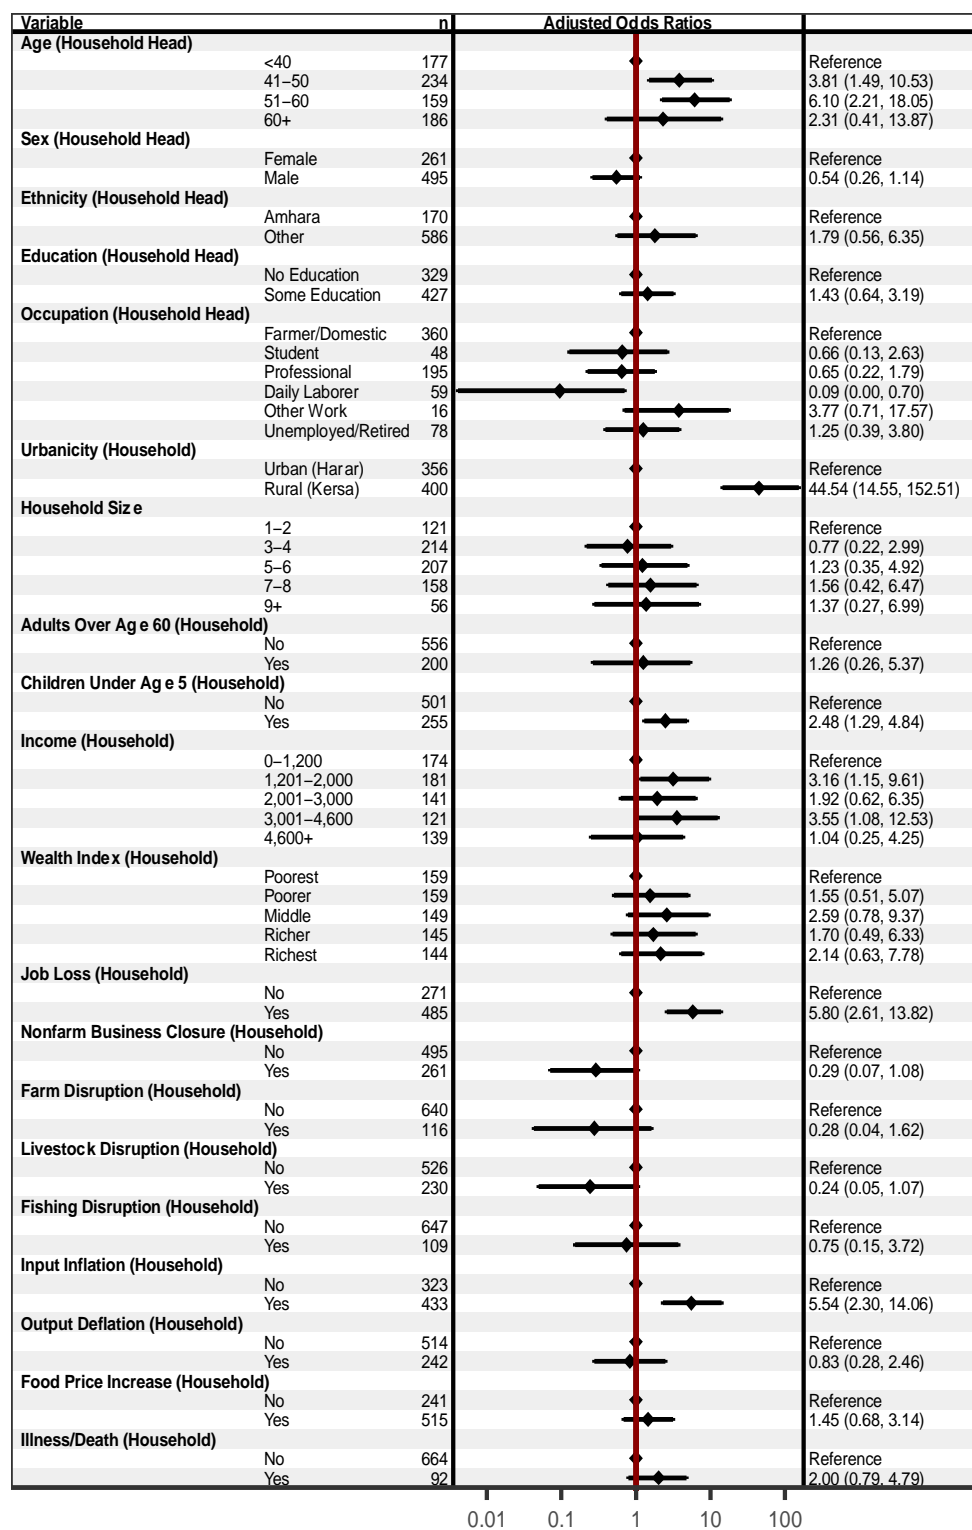

479  
480  
481  
482  
483  
484

Figure A5. Adjusted Associations with *Borrowed from Family or Friends* presented as Adjusted Odds Ratios (AOR). The forest plot presents AORs with 95% confidence intervals from an adjusted logistic regression model. The AORs were adjusted for the other variables included in the model. Education and Occupation had 9 missing values; Income had one outlier set to missing. (n=756)

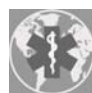

## 485 References

- 486 1. Wang, H.; Paulson, K.R.; Pease, S.A.; Watson, S.; Comfort, H.; Zheng, P.; Aravkin, A.Y.; Bisignano, C.; Barber, R.M.; Alam,  
487 T. Estimating excess mortality due to the COVID-19 pandemic: a systematic analysis of COVID-19-related mortality,  
488 2020–21. *The Lancet* **2022**.
- 489 2. Baldwin, R.E.; Weder, B. *Mitigating the COVID Economic Crisis: Act Fast and Do Whatever It Takes*; CEPR press: 2020.
- 490 3. Picchioni, F.; Goulao, L.F.; Roberfroid, D. The Impact of COVID-19 on Diet Quality, Food Security and Nutrition in Low  
491 and Middle Income Countries: A Systematic Review of the Evidence. *Clinical Nutrition* **2021**.
- 492 4. Osendarp, S.; Akuoku, J.K.; Black, R.E.; Headey, D.; Ruel, M.; Scott, N.; Shekar, M.; Walker, N.; Flory, A.; Haddad, L. The  
493 COVID-19 Crisis Will Exacerbate Maternal and Child Undernutrition and Child Mortality in Low-and Middle-Income  
494 Countries. *Nature Food* **2021**, *2*, 476-484.
- 495 5. Akseer, N.; Kandru, G.; Keats, E.C.; Bhutta, Z.A. COVID-19 Pandemic and Mitigation Strategies: Implications for Maternal  
496 and Child Health and Nutrition. *The American Journal of Clinical Nutrition* **2020**, *112*, 251-256, doi:10.1093/ajcn/nqaa171.
- 497 6. Onyango, E.O.; Crush, J.; Owuor, S. Preparing for COVID-19: Household Food Insecurity and Vulnerability to Shocks in  
498 Nairobi, Kenya. *PLoS ONE* **2021**, *16*, e0259139.
- 499 7. Hirvonen, K.; de Brauw, A.; Abate, G.T. Food Consumption and Food Security During the COVID-19 Pandemic in Addis  
500 Ababa. *American Journal of Agricultural Economics* **2021**, *103*, 772-789.
- 501 8. Ayanlade, A.; Radeny, M. COVID-19 and Food Security in Sub-Saharan Africa: implications of Lockdown during  
502 Agricultural Planting Seasons. *npj Science of Food* **2020**, *4*, 1-6.
- 503 9. Hirvonen, K.; Abate, G.T.; de Brauw, A. Survey Suggests Rising Risk of Food and Nutrition Insecurity in Addis Ababa,  
504 Ethiopia, as COVID-19 Restrictions Continue. *IFPRI book chapters* **2020**, 46-49.
- 505 10. Chitiga, M.; Henseler, M.; Mabuğu, R.E.; Maisonnave, H. How COVID-19 pandemic worsens the economic situation of  
506 women in South Africa. *The European Journal of Development Research* **2021**, 1-18.
- 507 11. Fikire, A.H.; Zegeye, M.B. Determinants of Rural Household Food Security Status in North Shewa Zone, Amhara Region,  
508 Ethiopia. *The Scientific World Journal* **2022**, 2022.
- 509 12. Manfrinato, C.V.; Marino, A.; Condé, V.F.; Maria do Carmo, P.F.; Stedefeldt, E.; Tomita, L.Y. High prevalence of food  
510 insecurity, the adverse impact of COVID-19 in Brazilian favela. *Public health nutrition* **2021**, *24*, 1210-1215.
- 511 13. Banna, M.; Al, H.; Sayeed, A.; Kundu, S.; Kagstrom, A.; Sultana, M.; Begum, M.R.; Khan, M.S.I. Factors associated with  
512 household food insecurity and dietary diversity among day laborers amid the COVID-19 pandemic in Bangladesh. *BMC*  
513 *nutrition* **2022**, *8*, 1-11.
- 514 14. Roberton, T.; Carter, E.D.; Chou, V.B.; Stegmuller, A.R.; Jackson, B.D.; Tam, Y.; Sawadogo-Lewis, T.; Walker, N. Early  
515 Estimates of the Indirect Effects of the COVID-19 Pandemic on Maternal and Child Mortality in Low-Income and  
516 Middle-Income Countries: A Modeling Study. *The Lancet Global Health* **2020**, *8*, e901-e908.
- 517 15. Chen, J.; Vullikanti, A.; Santos, J.; Venkatramanan, S.; Hoops, S.; Mortveit, H.; Lewis, B.; You, W.; Eubank, S.; Marathe, M.  
518 Epidemiological and Economic Impact of COVID-19 in the US. *Scientific reports* **2021**, *11*, 1-12.
- 519 16. Clark, S.; Wakefield, J.; McCormick, T.; Ross, M. Hyak Mortality Monitoring System: Innovative Sampling and Estimation  
520 Methods—Proof of Concept by Simulation. *Global Health, Epidemiology and Genomics* **2018**, *3*.
- 521 17. Goshu, D.; Ferede, T.; Diriba, G.; Ketema, M. *Economic and Welfare Effects of COVID-19 and Responses in Ethiopia: Initial*  
522 *Insights*; Ethiopian Economic Policy Research Institute: 2020.
- 523 18. Shigute, Z.; Mebratie, A.D.; Alemu, G.; Bedi, A. Containing the Spread of COVID-19 in Ethiopia. *Journal of Global Health*  
524 **2020**, *10*.
- 525 19. Spielman, S.E.; Tuccillo, J.; Folch, D.C.; Schweikert, A.; Davies, R.; Wood, N.; Tate, E. Evaluating Social Vulnerability  
526 Indicators: Criteria and Their Application to the Social Vulnerability Index. *Natural Hazards* **2020**, *100*, 417-436.



- 527 20. Muir, J.A.; Cope, M.R.; Angeningsih, L.R.; Jackson, J.E.; Brown, R.B. Migration and Mental Health in the Aftermath of  
528 Disaster: Evidence From MT. Merapi, Indonesia. *International journal of environmental research and public health* **2019**, *16*,  
529 2726.
- 530 21. Muir, J.A.; Cope, M.R.; Angeningsih, L.R.; Jackson, J.E. To Move Home or Move On? Investigating the Impact of Recovery  
531 Aid on Migration Status as a Potential Tool for Disaster Risk Reduction in the Aftermath of Volcanic Eruptions in Merapi,  
532 Indonesia. *International Journal of Disaster Risk Reduction* **2020**, *46*, 101478.
- 533 22. Perry, R.W. What is a Disaster? In *Handbook of Disaster Research*; Springer: 2007; pp. 1-15.
- 534 23. Cutter, S.L.; Barnes, L.; Berry, M.; Burton, C.; Evans, E.; Tate, E.; Webb, J. A place-based model for understanding  
535 community resilience to natural disasters. *Global environmental change* **2008**, *18*, 598-606.
- 536 24. Cutter, S.L.; Boruff, B.J.; Shirley, W.L. Social vulnerability to environmental hazards. In *Hazards vulnerability and*  
537 *environmental justice*; Routledge: 2012; pp. 143-160.
- 538 25. Flanagan, B.E.; Gregory, E.W.; Hallisey, E.J.; Heitgerd, J.L.; Lewis, B. A Social Vulnerability Index for Disaster  
539 Management. *Journal of Homeland Security and Emergency Management* **2011**, *8*.
- 540 26. Muir, J.A. *Societal Shocks as Social Determinants of Health*; The Ohio State University: 2021.
- 541 27. Muir, J.A. *Indicators of Fertility Change in a Developing Nation: Examining the Impact of Motorcycles as a Distance Demolishing*  
542 *Technology on Fertility Change in Rural Indonesia*; Brigham Young University: 2012.
- 543 28. Sanders, S.R.; Muir, J.A.; Brown, R.B. Overcoming Geographic Penalties of Inequality: The Effects of  
544 Distance-Demolishing Technologies on Household Well-Being in Vietnam. *Asian Journal of Social Science* **2018**, *46*, 260-280.
- 545 29. Gebru, M.; Remans, R.; Brouwer, I.D.; Baye, K.; Melesse, M.B.; Covic, N.; Habtamu, F.; Abay, A.H.; Hailu, T.; Hirvonen, K.  
546 Food systems for healthier diets in Ethiopia: Toward a research agenda. *IFPRI Discussion Paper* **2018**.
- 547 30. Haile, D.; Seyoum, A.; Azmeraw, A. Food and nutrition security impacts of resilience capacity: Evidence from rural  
548 Ethiopia. *Journal of Agriculture and Food Research* **2022**, *8*, 100305.
- 549 31. Juntunen, L. Addressing Social Vulnerability to Hazards. University of Oregon Eugene, 2004.
- 550 32. Assefa, N.; Oljira, L.; Baraki, N.; Demena, M.; Zelalem, D.; Ashenafi, W.; Dedefo, M. HDSS profile: the Kersa Health and  
551 Demographic Surveillance System. *International Journal of Epidemiology* **2016**, *45*, 94-101.
- 552 33. Cunningham, S.A.; Shaikh, N.I.; Nhacolo, A.; Raghunathan, P.L.; Kotloff, K.; Naser, A.M.; Mengesha, M.M.; Adedini, S.A.;  
553 Misore, T.; Onuwchekwa, U.U. Health and Demographic Surveillance Systems within the Child Health and Mortality  
554 Prevention Surveillance Network. *Clinical Infectious Diseases* **2019**, *69*, S274-S279.
- 555 34. Cunningham, S.A.; Muir, J.A. Data Cleaning. In *The Cambridge Handbook of Research Methods and Statistics for the Social and*  
556 *Behavioral Sciences: Volume 1: Building a Program of Research*; Cambridge University Press: In Press; Volume 1.
- 557 35. Cho, E. A comprehensive review of so-called Cronbach's alpha. *Journal of Product Research* **2020**, *38*, 9-20.
- 558 36. R Core Team R. *A Language and Environment for Statistical Computing*, R Foundation for Statistical Computing: Vienna,  
559 Austria, 2022.
- 560 37. Yeh, J.; D'Amico, F. Forest plots: data summaries at a glance. *Journal of Family Practice* **2004**, *53*, 1007-1008.
- 561 38. Lewis, S.C.; Keerie, C.; Assi, V. Forest Plot. In *Wiley StatsRef: Statistics Reference Online*; pp. 1-6.

562 **Disclaimer/Publisher's Note:** The findings and conclusions in this report are those of the authors and do not necessarily represent  
563 the views of the US Centers for Disease Control and Prevention. Likewise, the statements, opinions and data contained in all pub-  
564 lications are solely those of the individual author(s) and contributor(s) and not of MDPI and/or the editor(s). MDPI and/or the edi-  
565 tor(s) disclaim responsibility for any injury to people or property resulting from any ideas, methods, instructions or products re-  
566 ferred to in the content.
